# Supplementary material for: Targeted mass spectrometry for monitoring of neural differentiation
Source: Oxford University Press journal article supplement (doi:10.1242/bio.058727), 2021-07-06
Supplement: bio058727supp.pdf [file bio058727supp.pdf]

**Table S1. Markers routinely used to probe neuronal differentiation.**

[Click here to download Table S1](#)

**Table S2. Targeted peptides.**

[Click here to download Table S2](#)

**Table S3. Antibodies used in the present study.**

[Click here to download Table S3](#)

**Table S4. Primers used for quantitative PCR analyses.**

[Click here to download Table S4](#)

**Table S5. Complete set of SRM assays.**

[Click here to download Table S5](#)

**Table S6. SRM quantification data across NSC differentiation experiments.**

[Click here to download Table S6](#)

**Table S7. SRM to qPCR data correlation.**

[Click here to download Table S7](#)
